# Supplementary material for: Quality of CD8+ T cell immunity evoked in lymph nodes is compartmentalized by route of antigen transport and functional in tumor context
Source: PubMed Central journal article supplement — Sci Adv. 2020 Dec 11;6(50):eabd7134. doi: 10.1126/sciadv.abd7134 (PMC7732197; doi:10.1126/sciadv.abd7134), 2020-12-11
Supplement: abd7134_SM.pdf [file abd7134_SM.pdf]

## Supplementary Materials for

### **Quality of CD8<sup>+</sup> T cell immunity evoked in lymph nodes is compartmentalized by route of antigen transport and functional in tumor context**

M. J. O'Melia, N. A. Rohner, M. P. Manspeaker, D. M. Francis, H. T. Kissick, S. N. Thomas\*

\*Corresponding author. Email: [susan.thomas@gatech.edu](mailto:susan.thomas@gatech.edu)

Published 11 December 2020, *Sci. Adv.* **6**, eabd7134 (2020)  
DOI: 10.1126/sciadv.abd7134

#### **This PDF file includes:**

Table S1  
Figs. S1 to S10

|                                      |                    |                    |          |
|--------------------------------------|--------------------|--------------------|----------|
| Hydrodynamic diameter (nm)           | 500                | 30                 | 10       |
| Molecular Weight (kDa)               | n/a                | 500                | 40       |
| Fluorescent Excitation/Emission (nm) | 505/515 or 580/605 | 647/670 or 700/720 | 555/575  |
| Zeta Potential                       | -31.3±0.5          | -2.2±0.8           | -1.7±1.6 |

**Supplemental Table 1. Tracer hydrodynamic sizes, molecular weights, fluorescent properties and zeta potentials.**

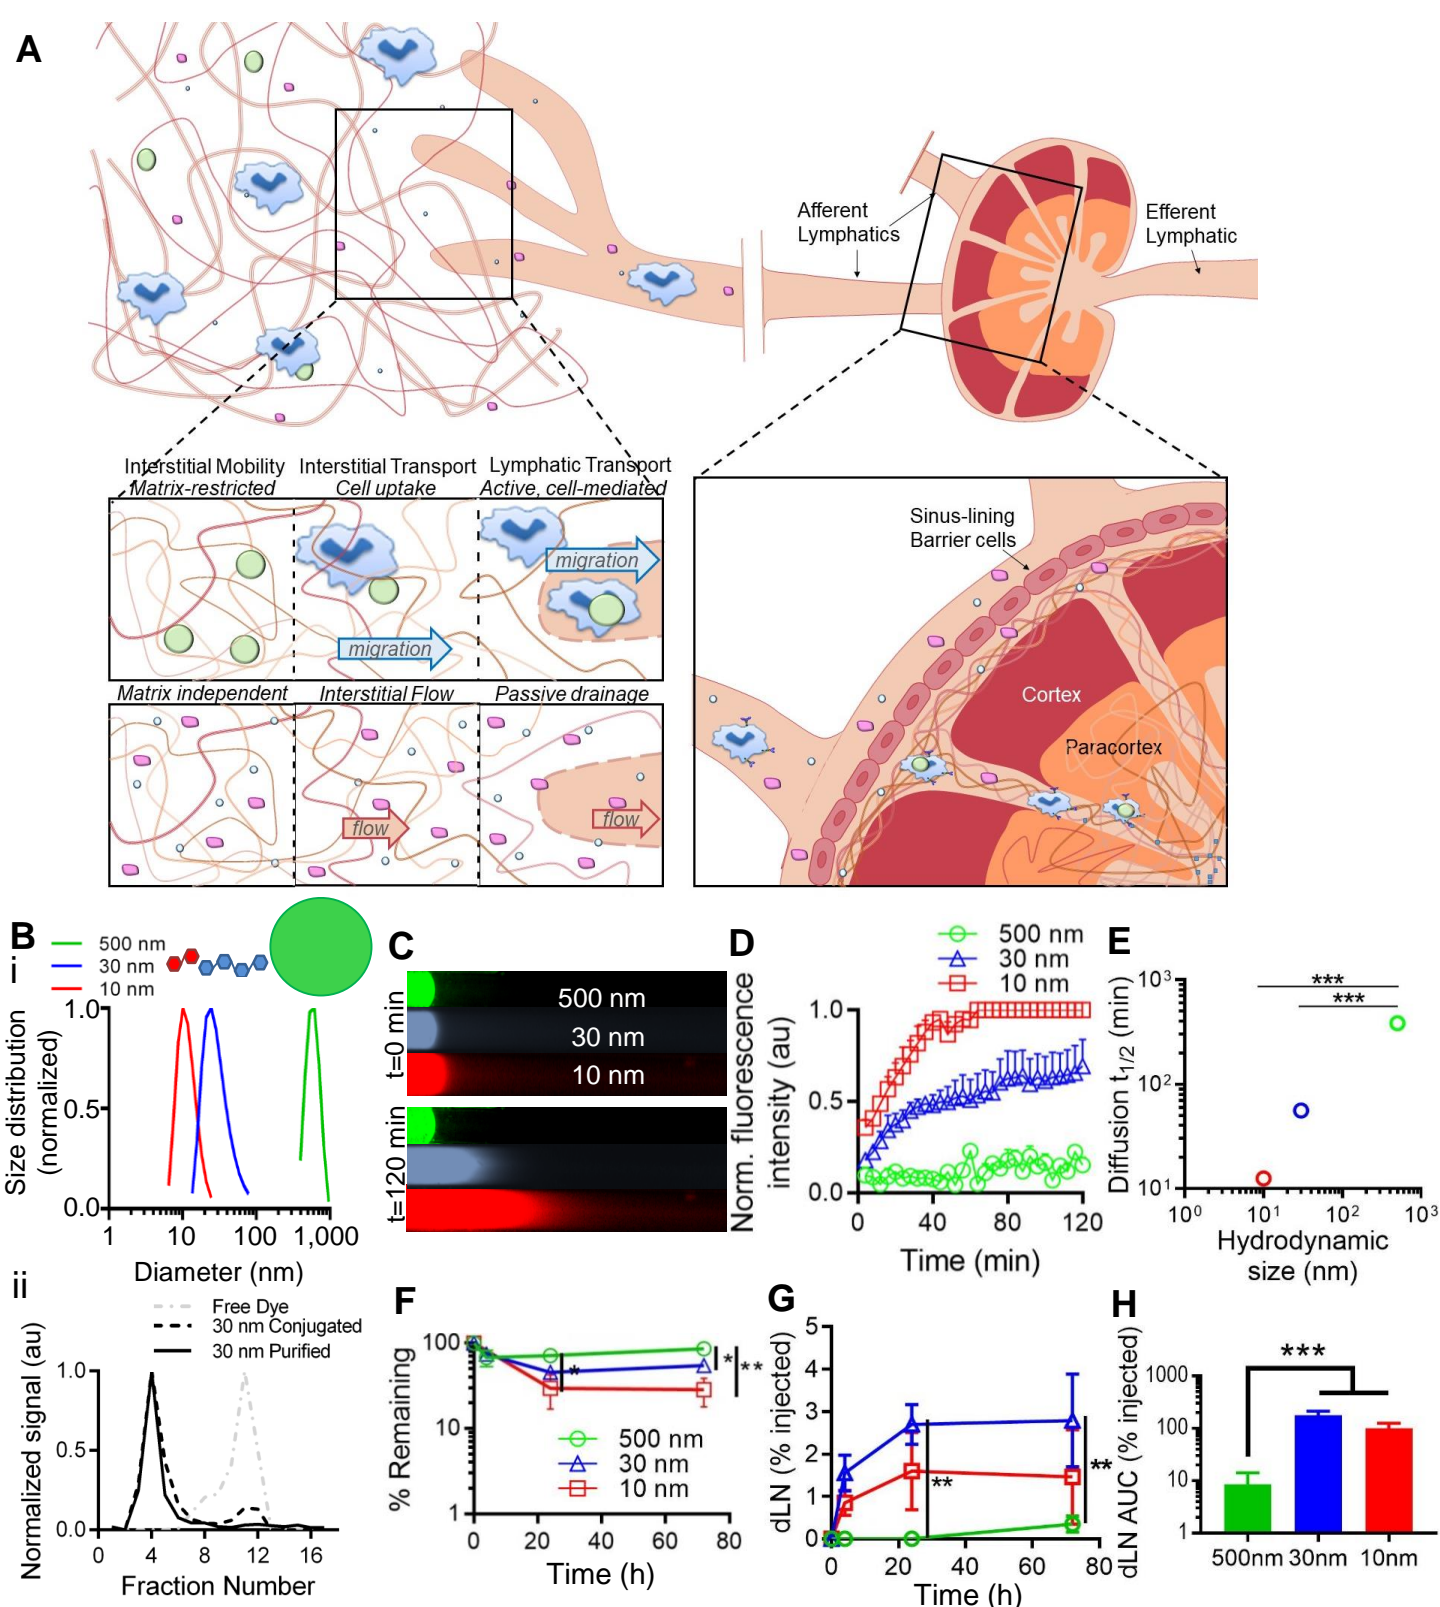

**Fig. S1. In vivo lymphatic transport patterns of fluorescent tracers differ with hydrodynamic size.** (A) Schematic of molecular transport within the peripheral tissue interstitium and dLN. (B) Dynamic light scattering measurements (i) and representative size exclusion chromatography purification of tracers post fluorescent labeling (ii). (C-E) In vitro diffusion of fluorescent tracers in collagen gel (5.6 mg/mL)-filled glass microcapillary tubes measured over time. (C) Representative fluorescent images. (D) Quantification of diffusion. (E) Calculated tracer diffusion half-lives versus hydrodynamic size. Percent tracer remaining at i.d. injection site (F) and accumulating within dLNs (G) over time. (H) total tracer exposure within dLN over 72 h as quantified by area under the curve (AUC). \*indicates significance by one-way ANOVA (F), or two-way ANOVA (G-I) with Tukey's comparison; F-H,  $n=4-6$  animals; C-E, 5 hydrogels; B-H are representative of at least two independent experiments.

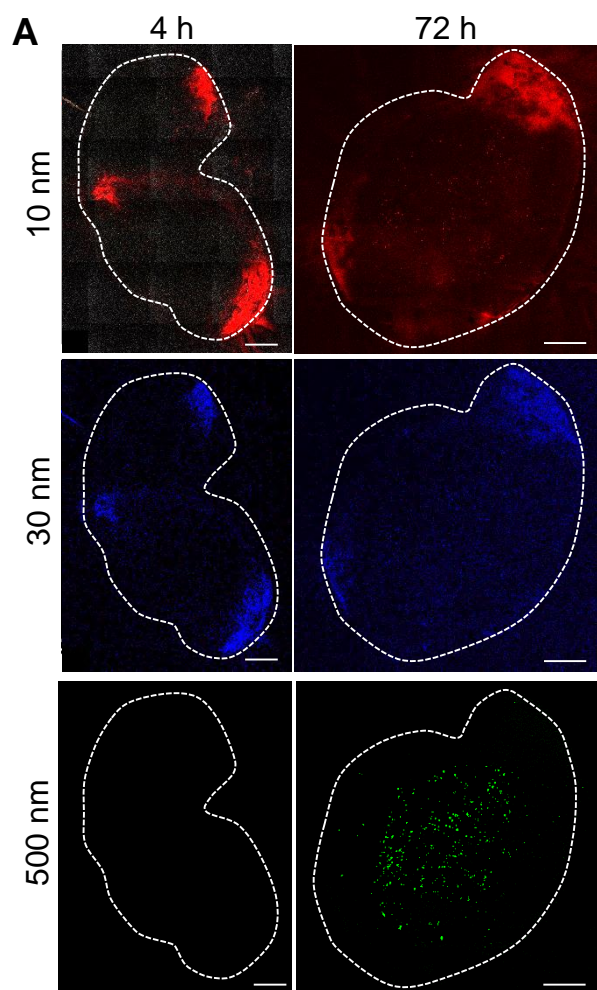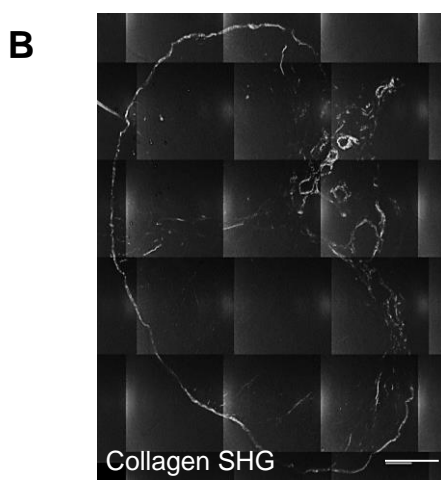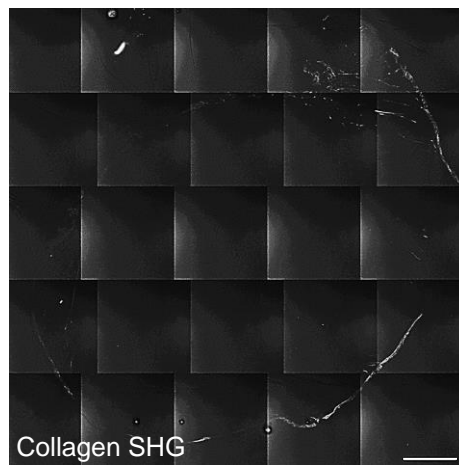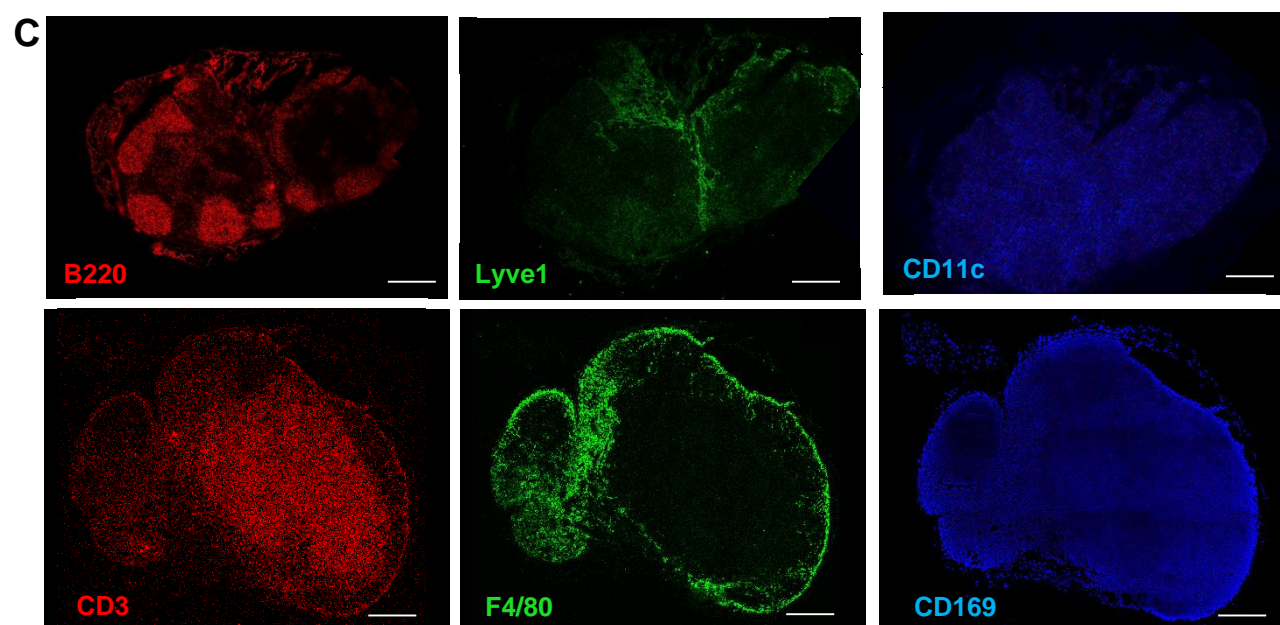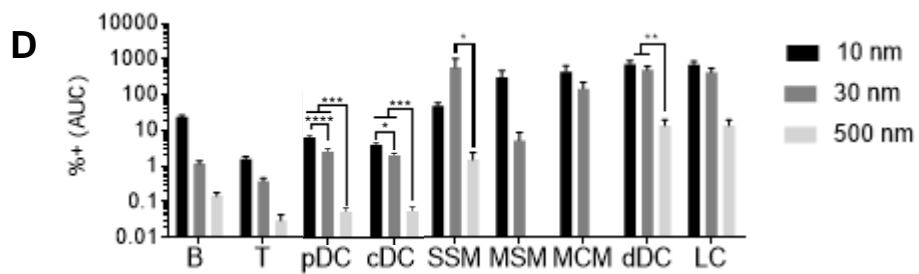

**Fig. S2. Naïve LN characterization.** (A) Original images of images presented in Figure 1A, which had heightened contrast to improve visualization tracer distributions within imaged LNs. (B) Collagen second-harmonic signal in LNs represented in Figure 1A, used to visualize the capsule to assess tracer distributions within dLNs. (C) Single channel images of B220, Lyve1, CD11c, CD3, F4/80, and CD169 staining within naïve LNs; (D) Tracer uptake within each cell type analyzed as area under the curve (AUC) from 0-72 h. \* indicates significance by two-way ANOVA with Tukey's post-hoc test; n=5-6 animals; this is representative of two independent experiments.

**A**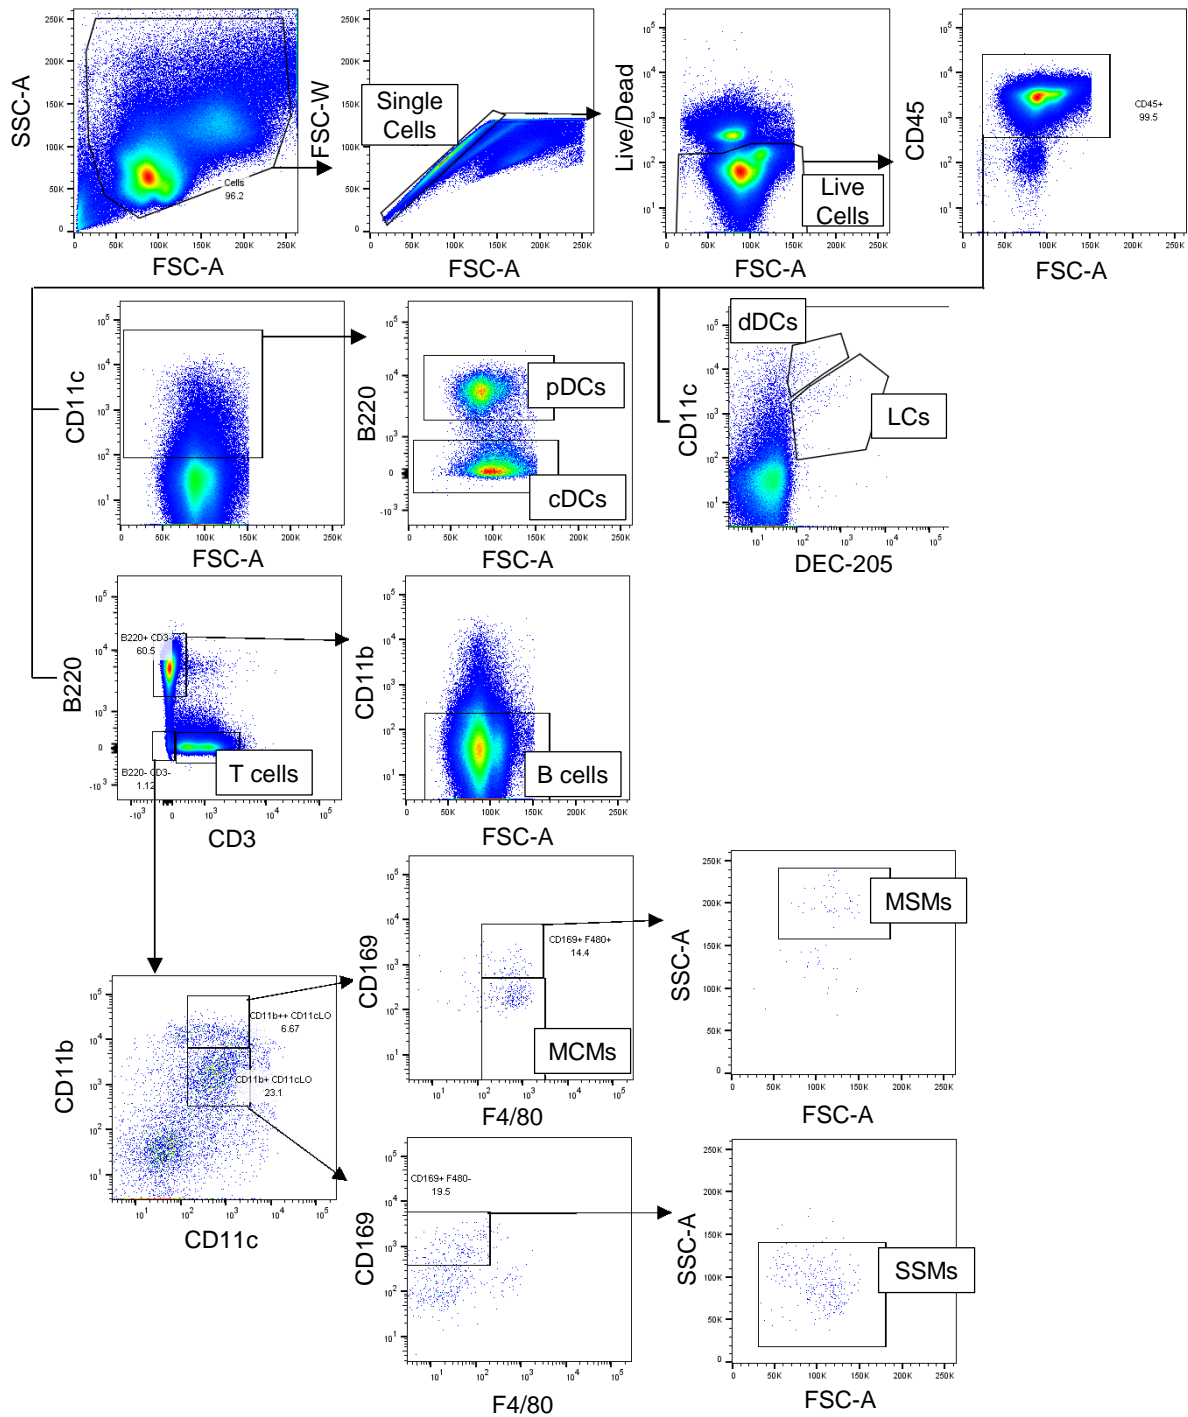**B**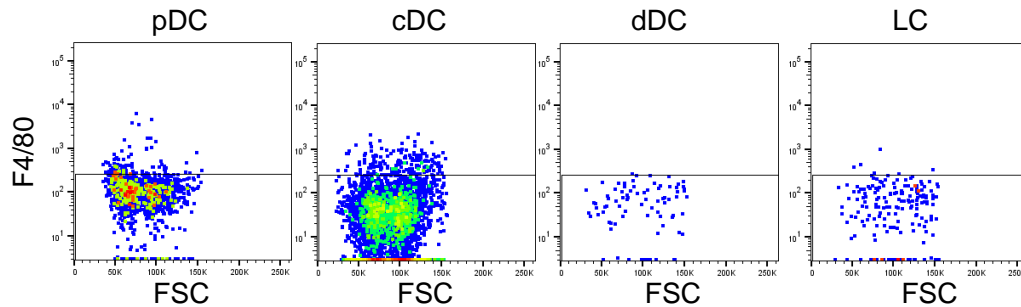

**Fig. S3. Gating strategy for dLN subpopulations. (A)** Gating of dLN paracortex-resident, barrier, and migratory cell subpopulations, **(B)** F4/80 signal among DC subsets, demonstrating low macrophage dilution within DC subsets analyzed.

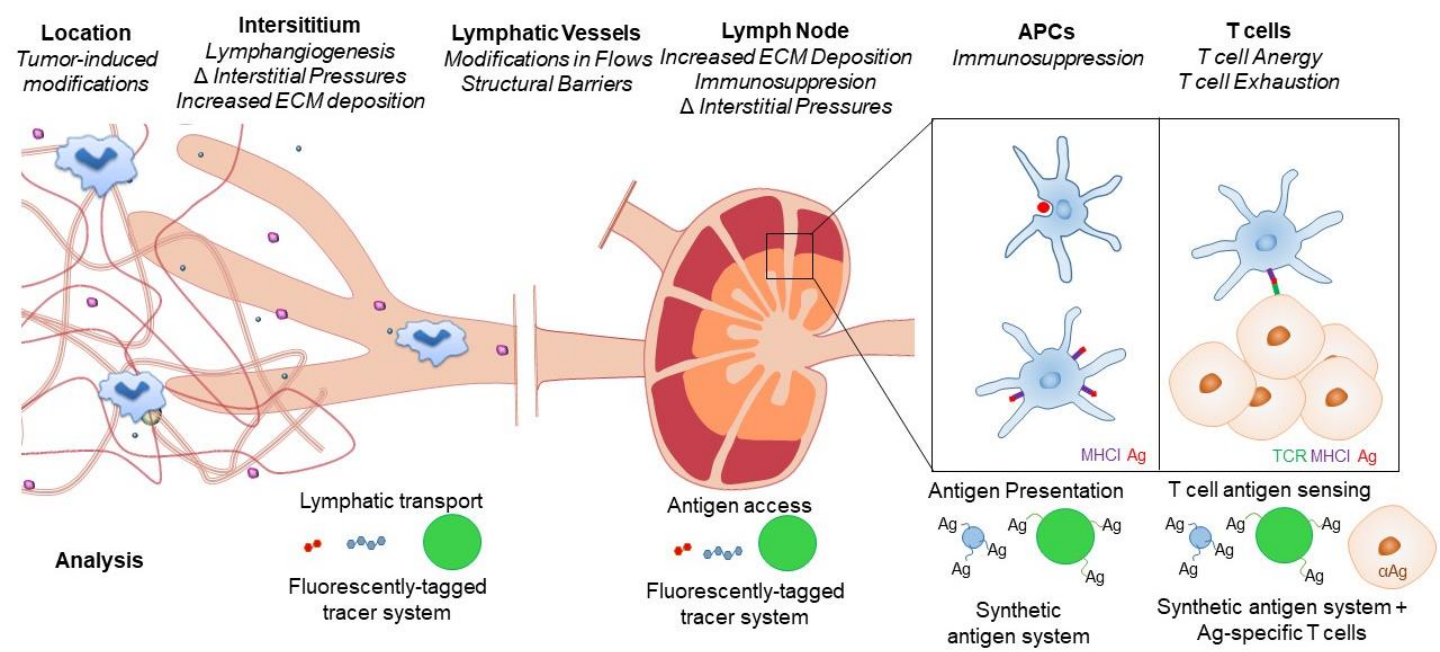

**Fig. S4.** Schematic diagram of tumor-induced modifications in the tumor interstitium, lymphatic vasculature, dLNs, APCs, and T cells with potential ramifications on lymphatic transport and T cell Ag-sensing, along with systems used to analyze each step of Ag access and T cell Ag sensing.

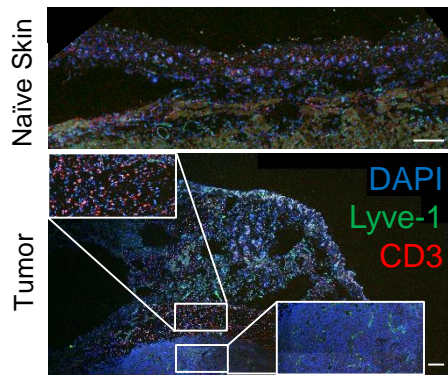

**Fig. S5.** Immunohistochemical analysis of naïve skin and d 7 B16F10 melanoma, stained with Lyve-1, CD3, and DAPI. Insets highlight peritumoral and intratumoral CD3 and Lyve-1 signals. Scale bars represent 200  $\mu\text{m}$ .



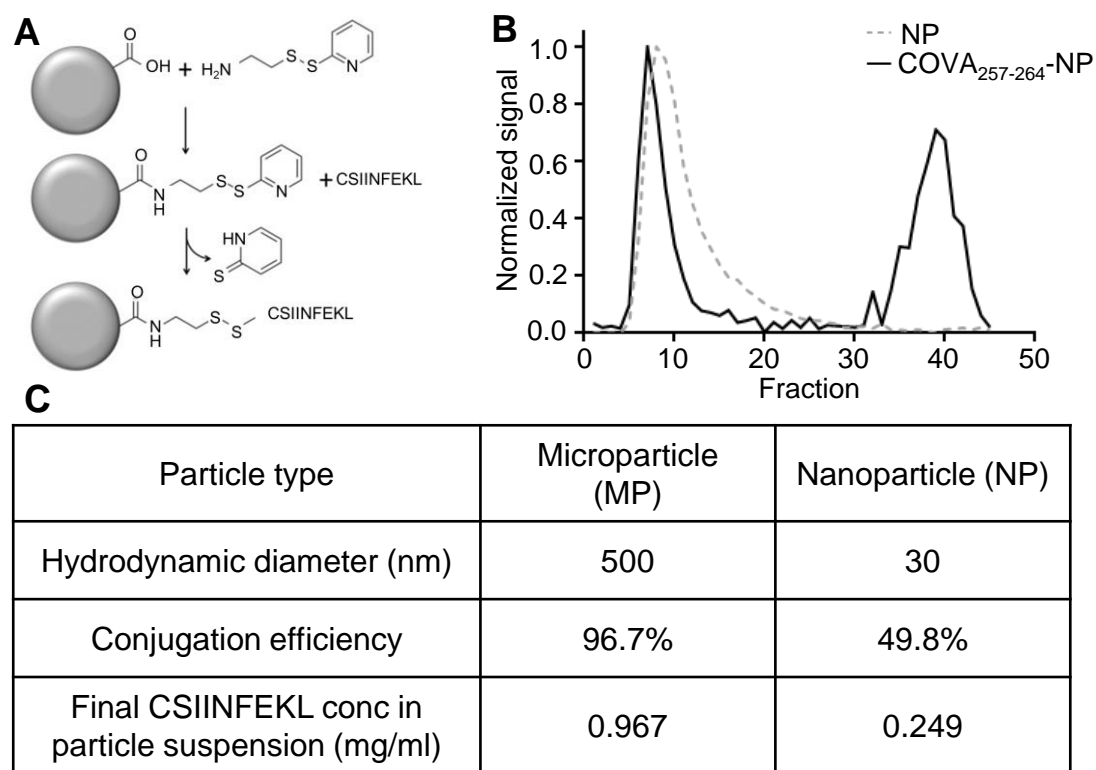

**Fig. S6. CSIINFEKL-NP and -MPs conjugation.** (A) Chemical method of COVA<sub>257-264</sub> peptide conjugation to MP or NP. (B) Purification of COVA<sub>257-264</sub>-NPs from unconjugated peptide by size exclusion chromatography. (C) Particle and conjugation characteristics.

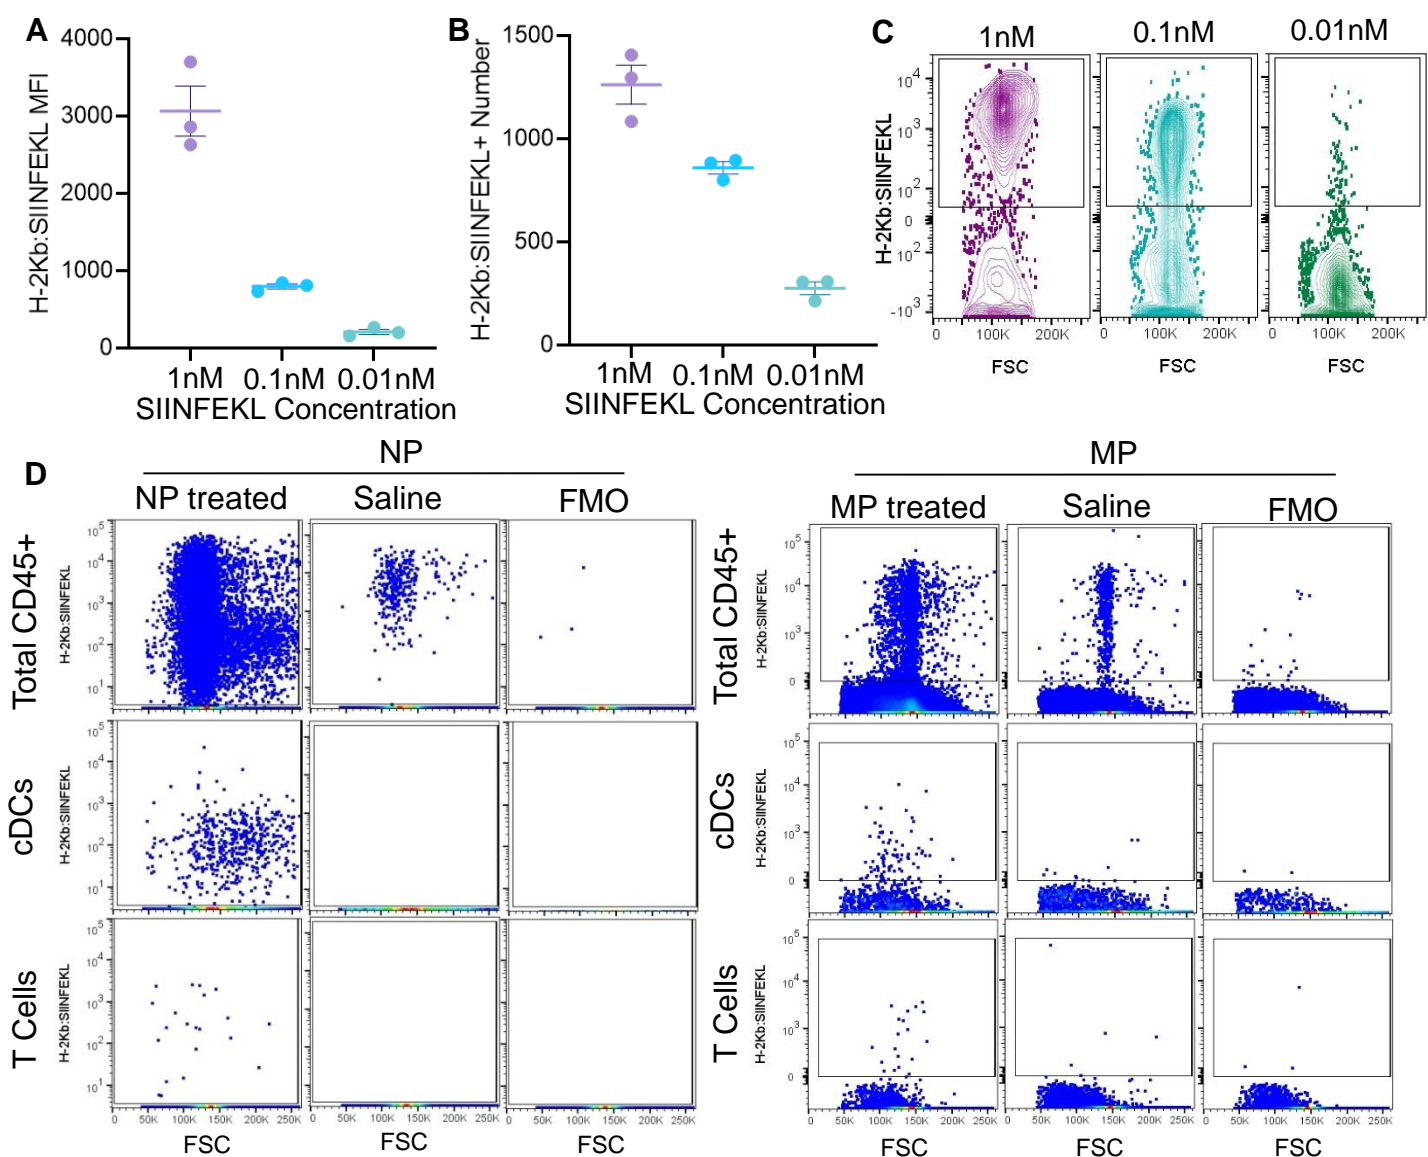

**Fig. S7. SIINFEKL presentation detection *in vitro* and *in vivo*.** H-2K<sup>b</sup>:SIINFEKL mean fluorescence index of H-2K<sup>b</sup>:SIINFEKL<sup>+</sup> cells (**A**) and number (**B**) 24 h after incubation of splenocytes *in vitro* with SIINFEKL peptide, represented in (**C**). Example H-2K<sup>b</sup>:SIINFEKL staining in LN draining NP, MP, and saline injection site, along with splenocytes stained with the full panel with the exception of the H-2K<sup>b</sup>:SIINFEKL antibody (FMO) (**D**); A-B are representative of two independent experiments.

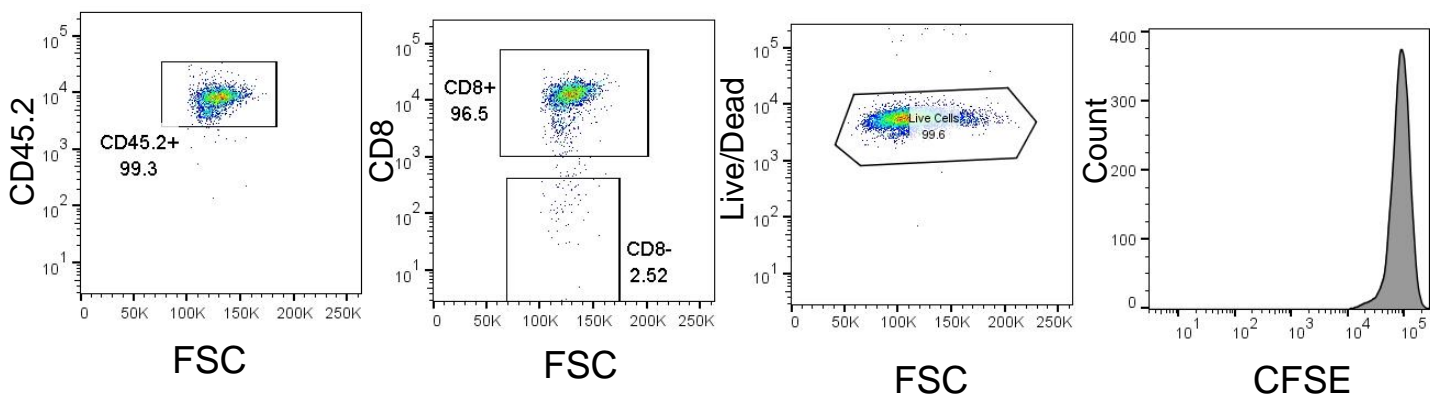

**Fig. S8. Purity, viability, and CFSE loading of adoptively transferred CD45.2<sup>+</sup>CD8<sup>+</sup> T cells.**

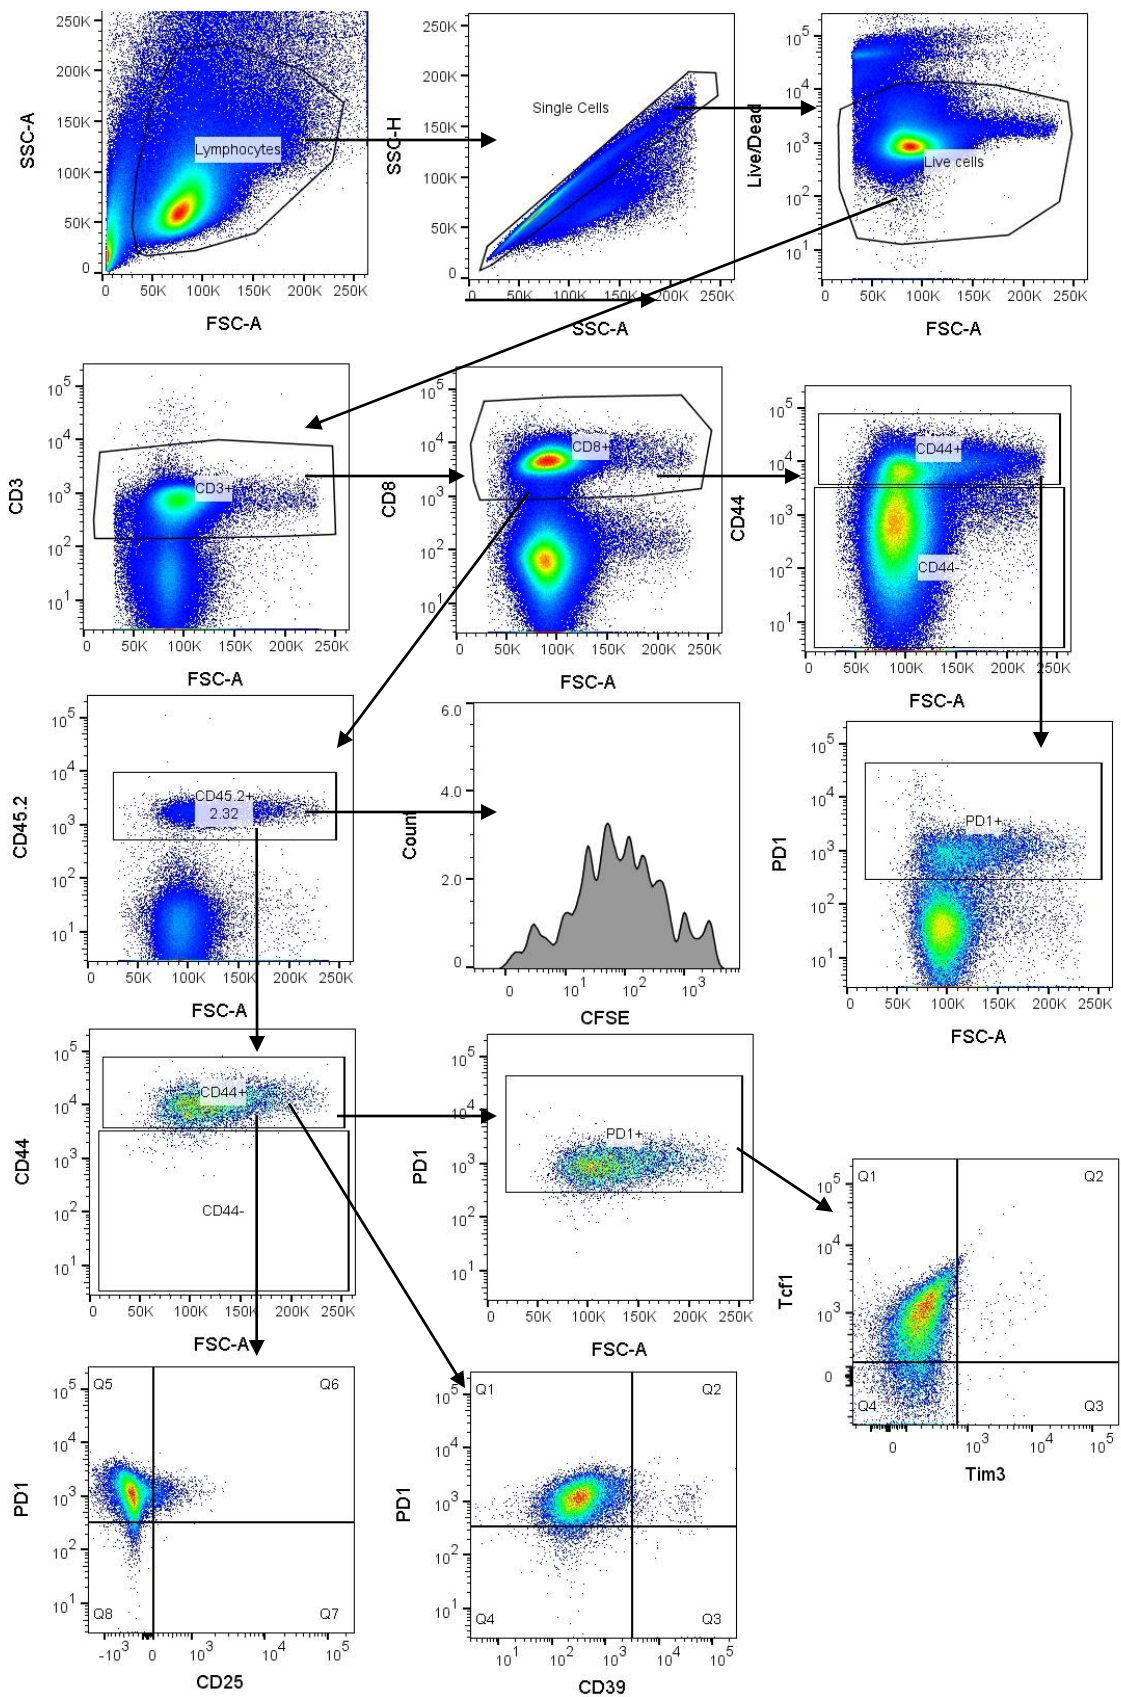

**Fig. S9. Gating for characterization of adoptively transferred cells after Ag exposure.** Data shown is from a representative dLN sample.

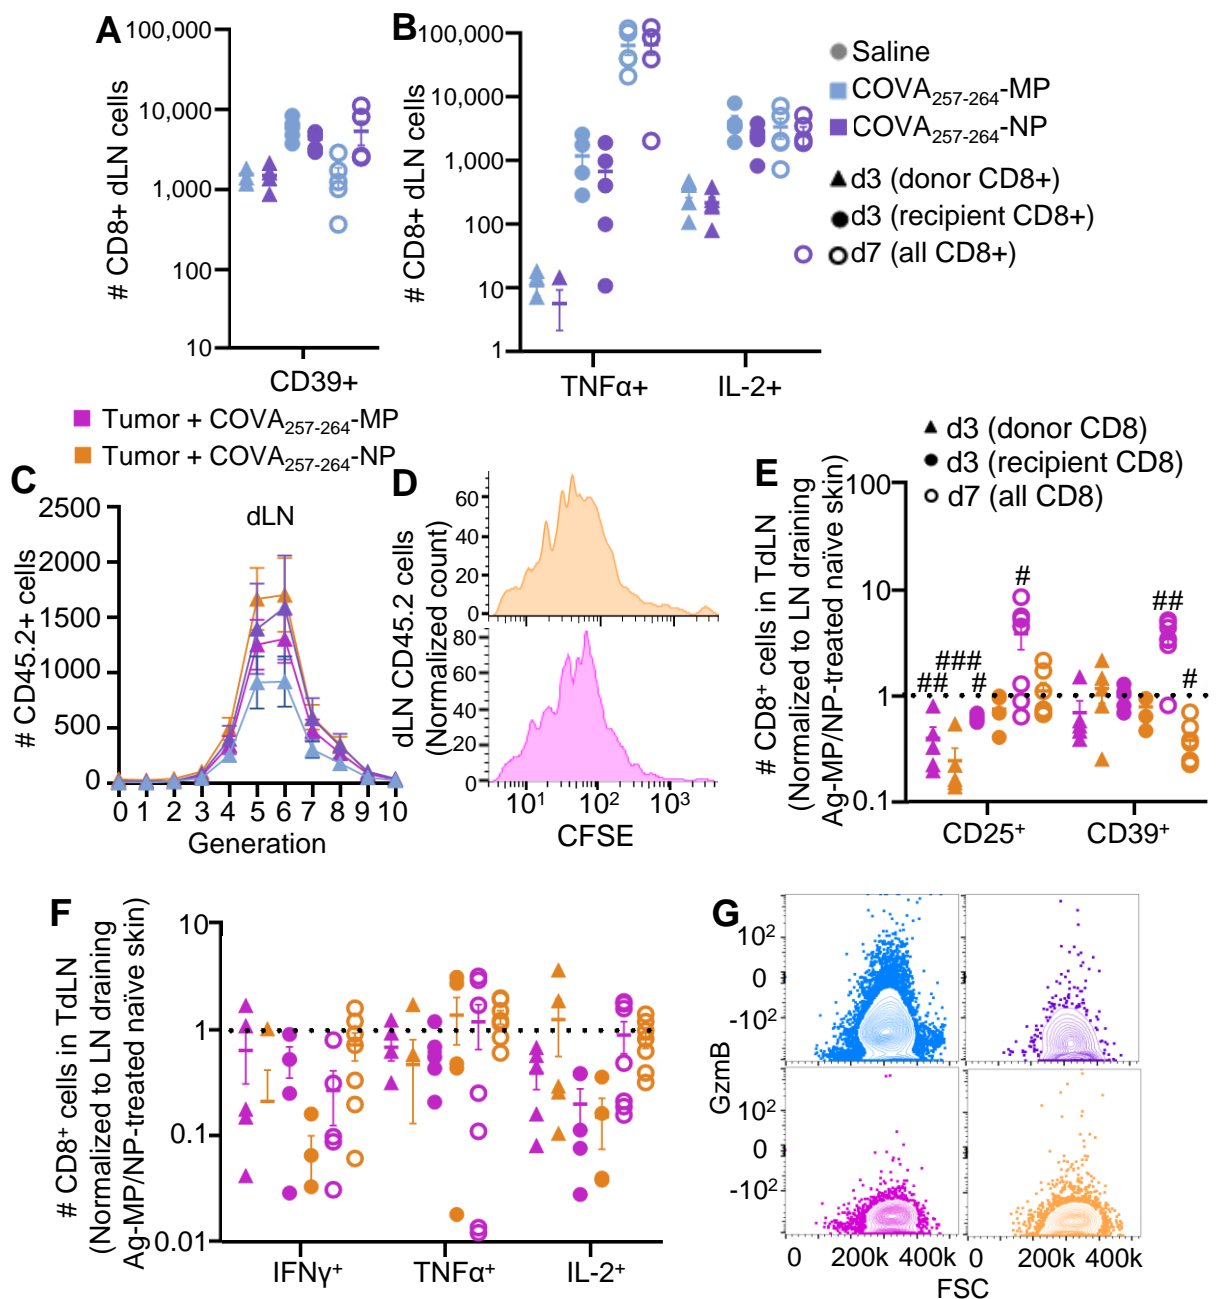

**Fig. S10. Characterization of CD8<sup>+</sup> T cells in dLN.** (A) Number of CD39 expressing cells in the dLN 3 or 7 d after Ag exposure (B) Number of cytokine-producing Ag-specific donor cells 3 or 7 d after treatment with synthetic Ag systems. Quantification (C) of representative flow cytometry plots (D) of Ag-specific donor cell proliferation within dLN 3 d after treatment of naïve and melanoma-bearing animals with Ag-MP or -NP. (E) Responding phenotype of Ag-specific donor cells 72 h after Ag-MP and -NP treatment and endogenous cells 3 and 7 d after Ag-MP or -NP treatment normalized to naïve condition. (F) Quantification of cytokine producing Ag-specific donor cells. (G) Representative flow cytometry plots of GzmB expression by donor cells 3 d post treatment. \* indicates significance against normalized value of 1.0 (representing no change relative to control) by one-sample; # indicates p<0.001 against normalized value of 1.0 (representing no change relative to control) by one-sample t-test; n=5-7 mice.
